# Supplementary material
Source: publisher figshare collection journal article supplement (https://asha.figshare.com/articles/dataset/_/28593971)

**Supplemental Material S1.** Plot of percentage onset/offset error (empirical CDF). Empirical cumulative distribution of *percentage* onset/offset error for the child speech corpus used in the study. Percentage onset/offset error is arguably more useful than absolute onset/offset error as phoneme subtypes can vary greatly in length (e.g. vowels vs plosives). The largest error is observed for plosives.

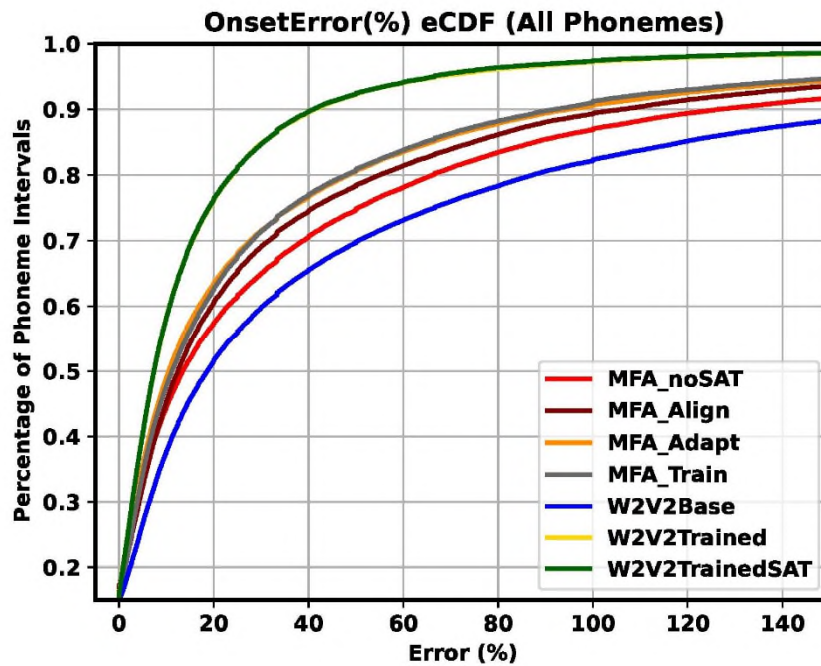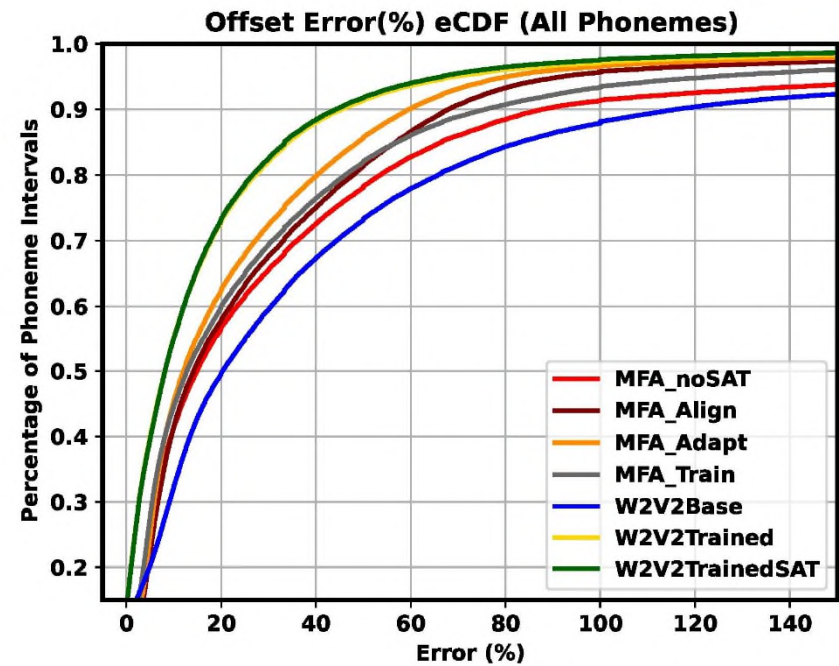

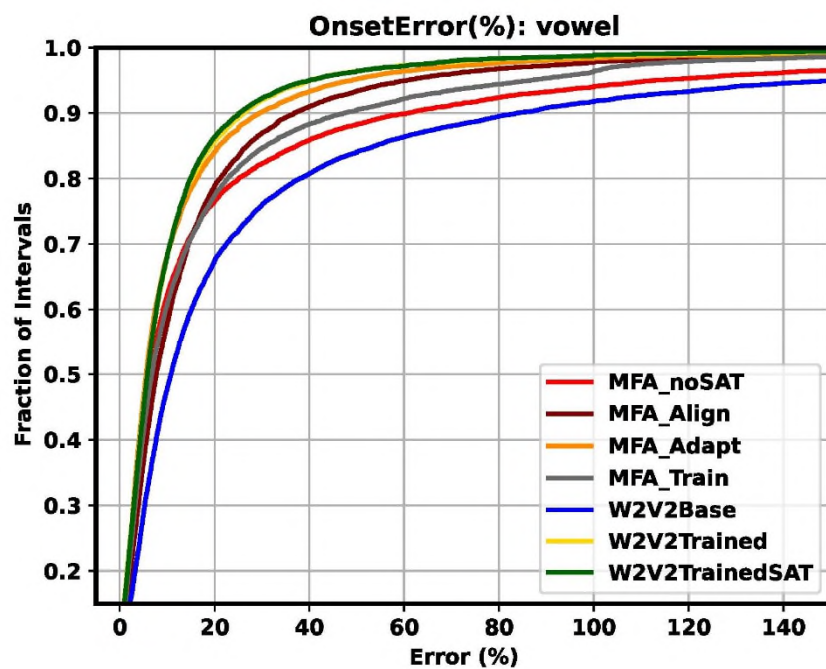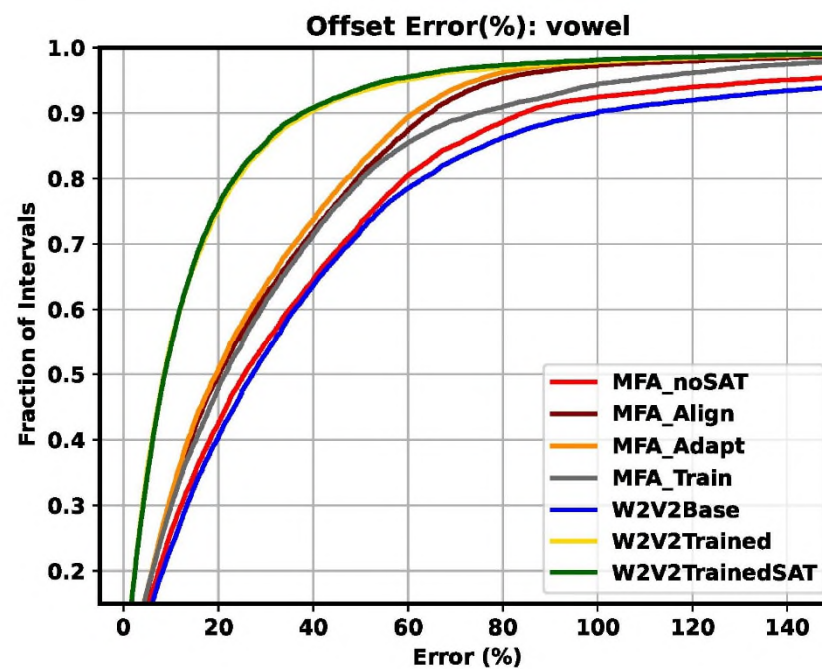

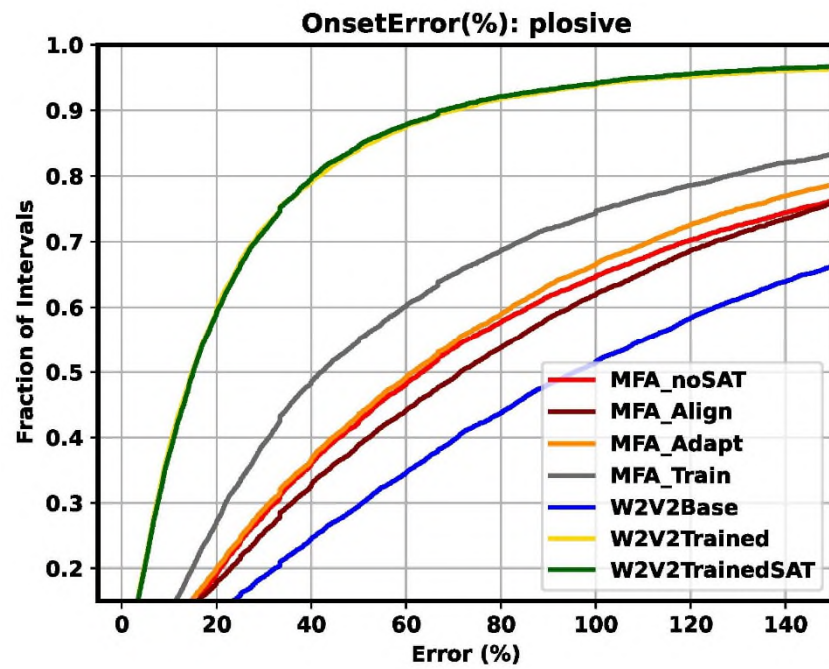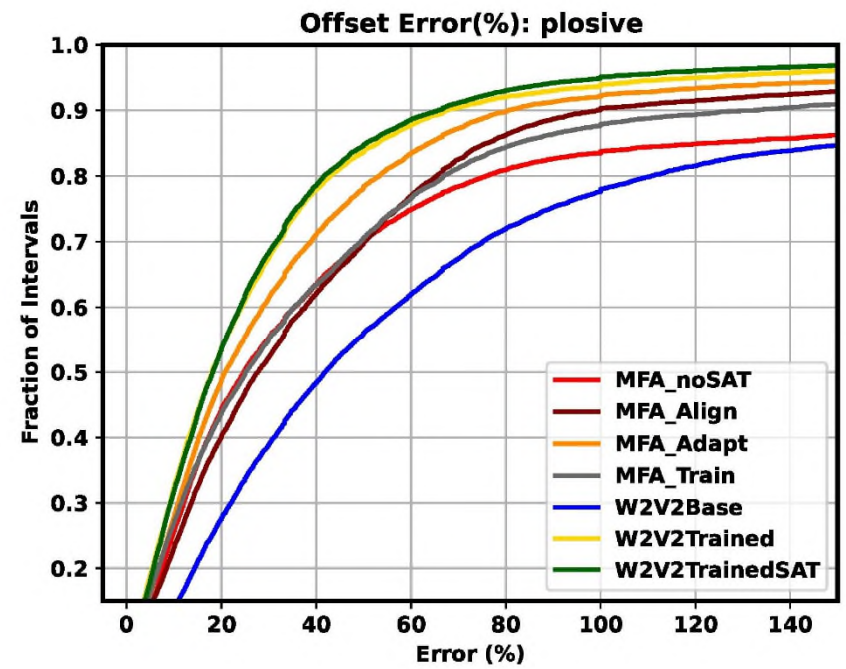

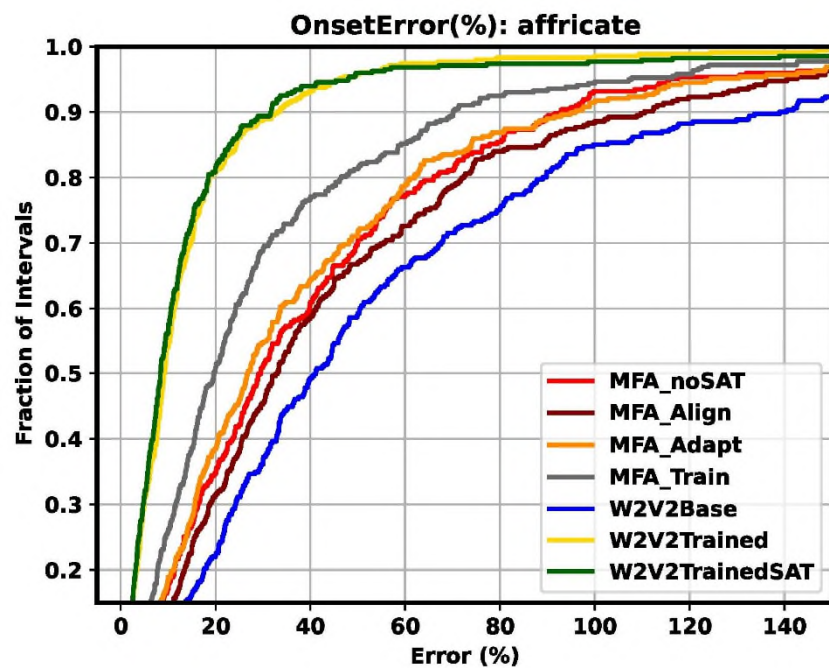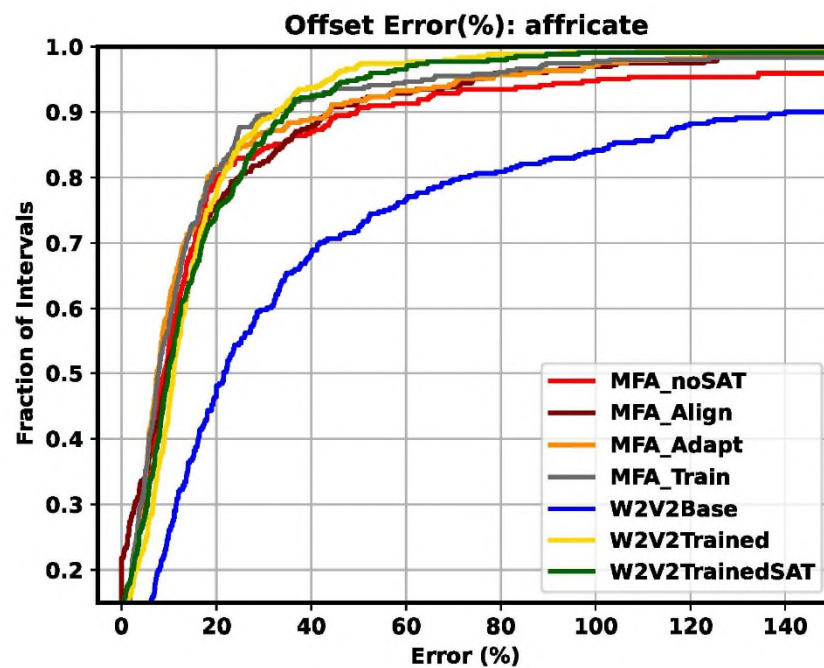

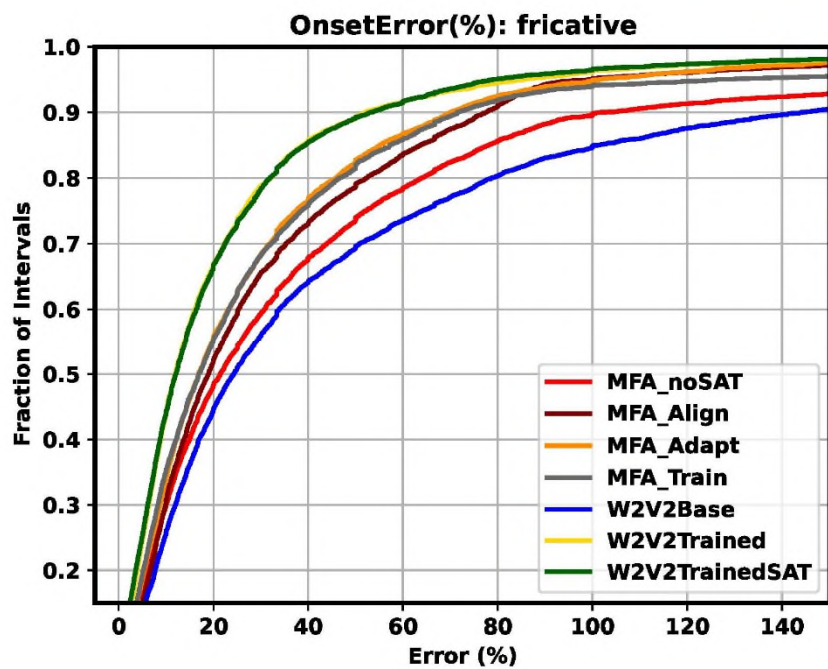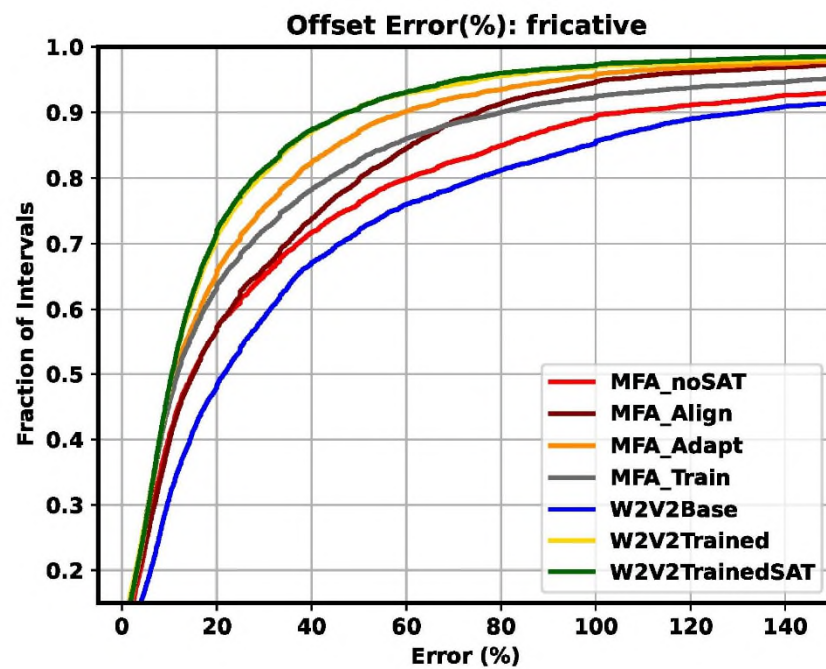

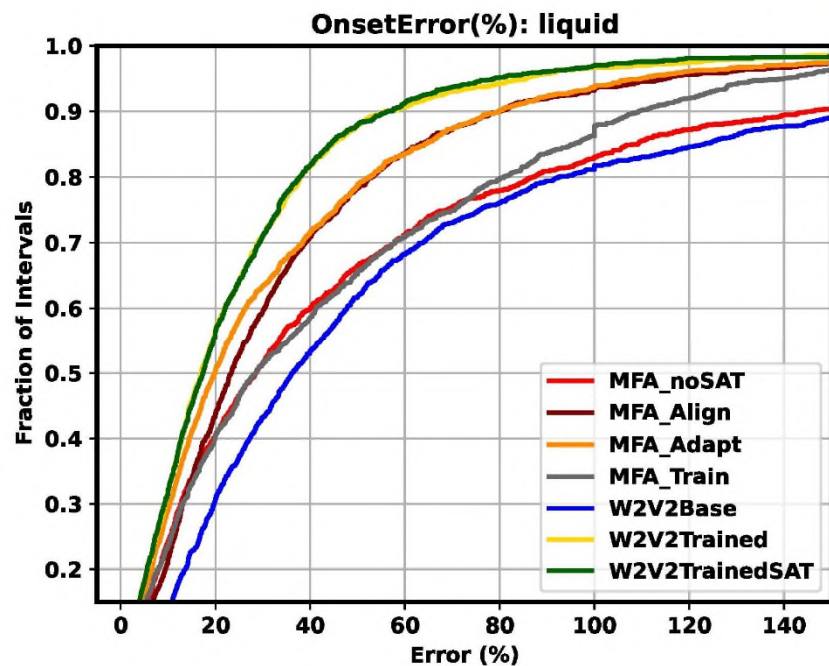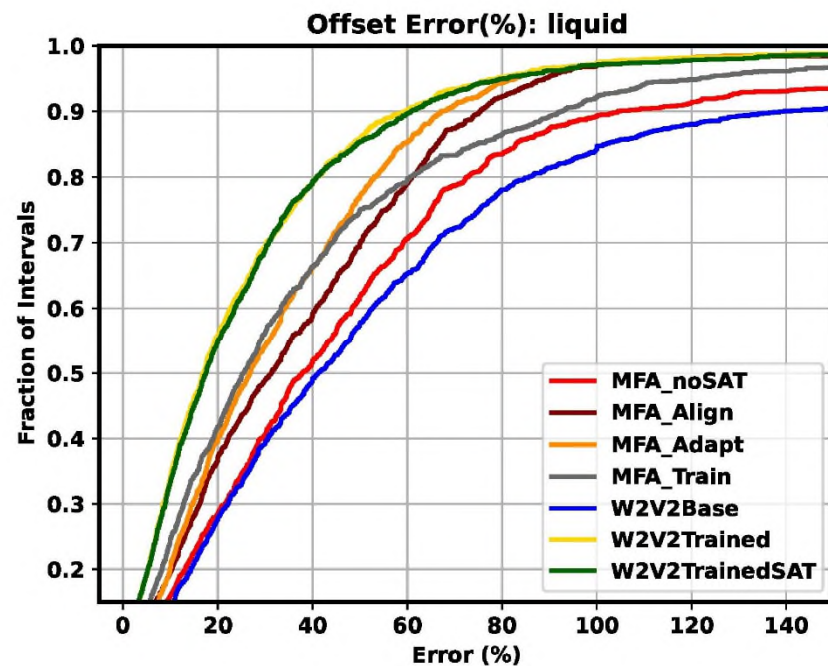

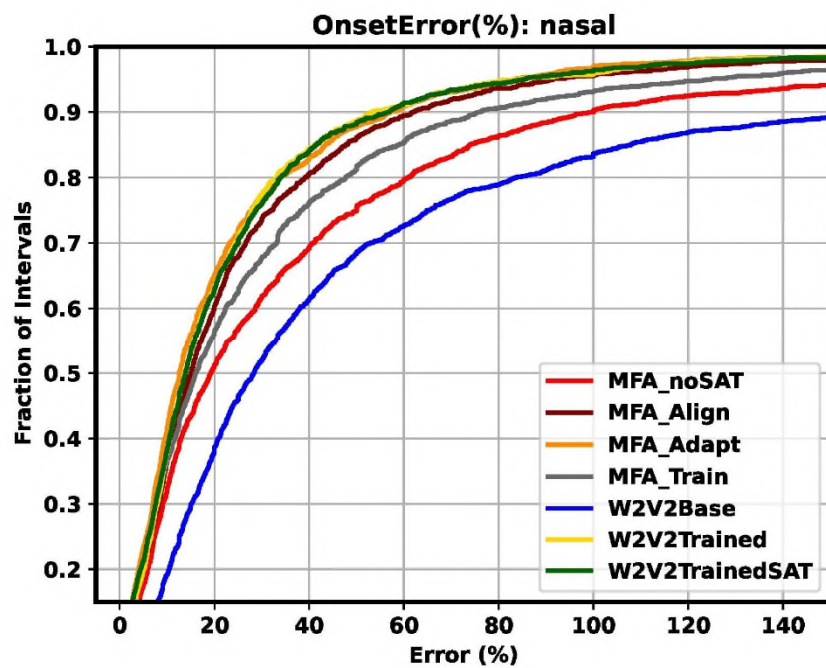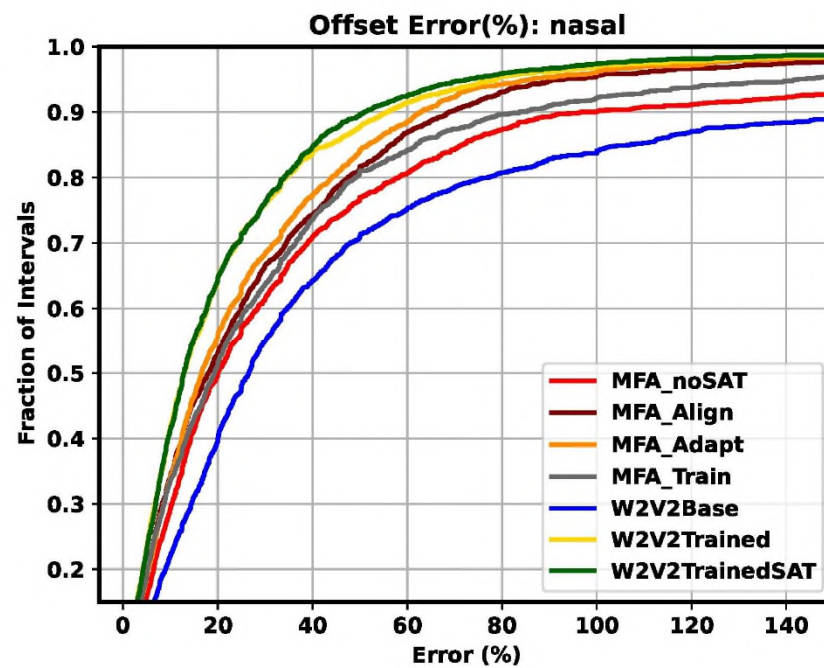

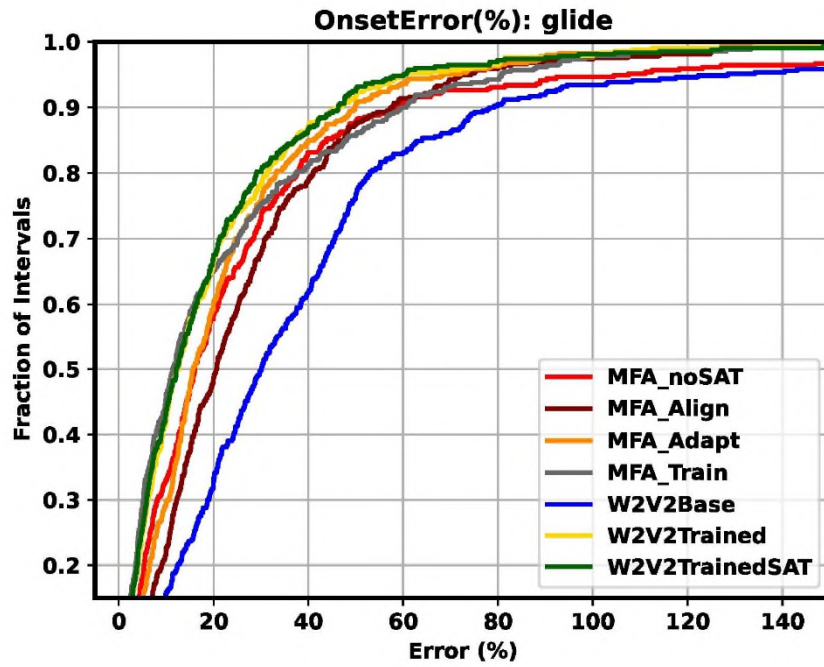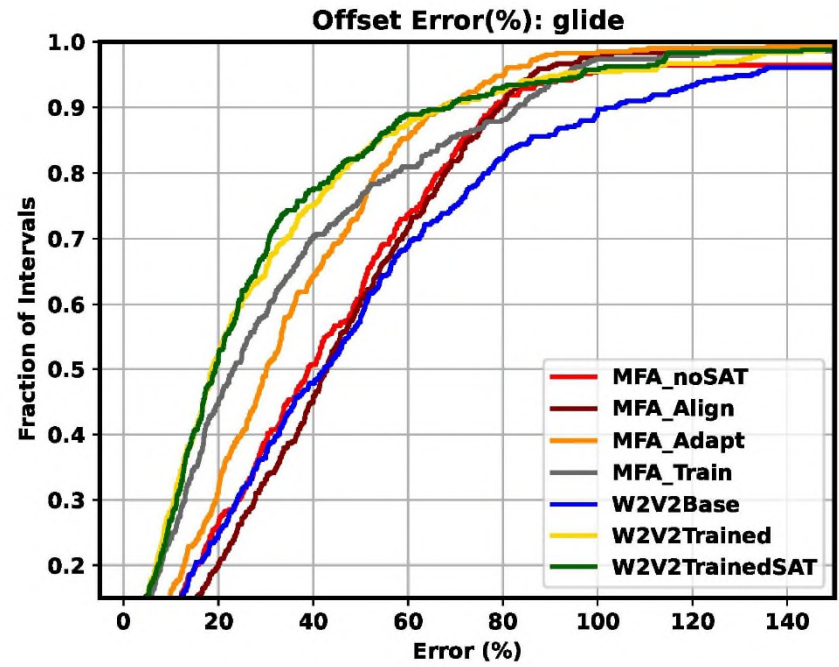

Supplement: Supplementary file 1 [file 1]
